# Supplementary figures and images for: Shortened Positive and Negative Symptom Scale as an Alternate Clinical Endpoint for Acute Schizophrenia Trials: Analysis from the US Food & Drug Administration
Source: Atypon-hosted journal article supplement (doi:10.1176/appi.prcp.20200003), 2020-11-06

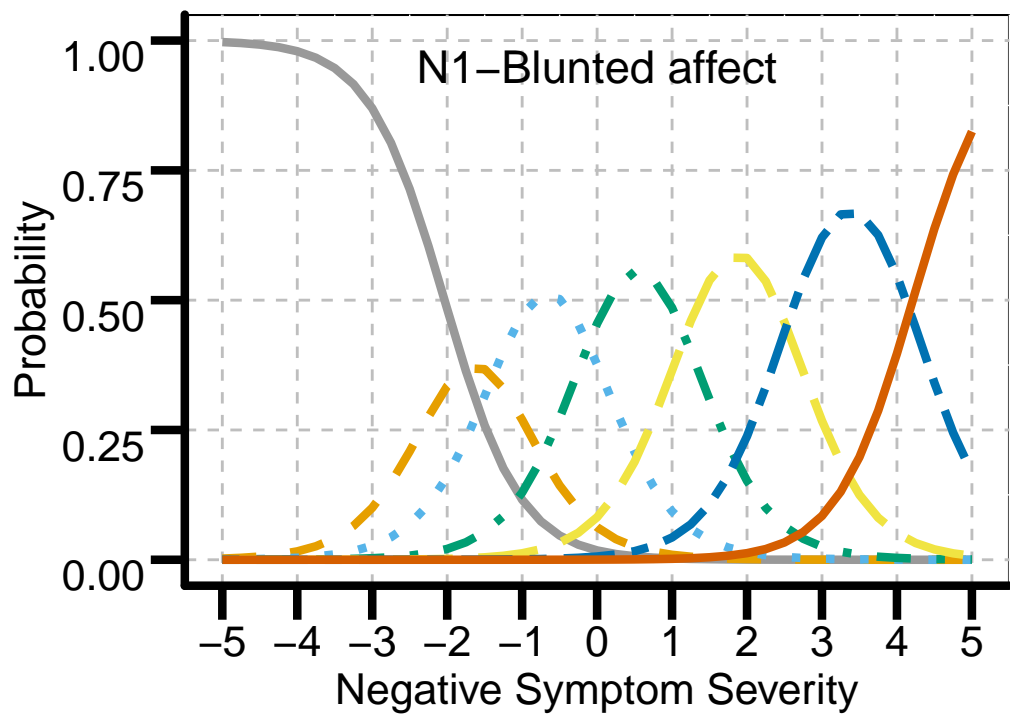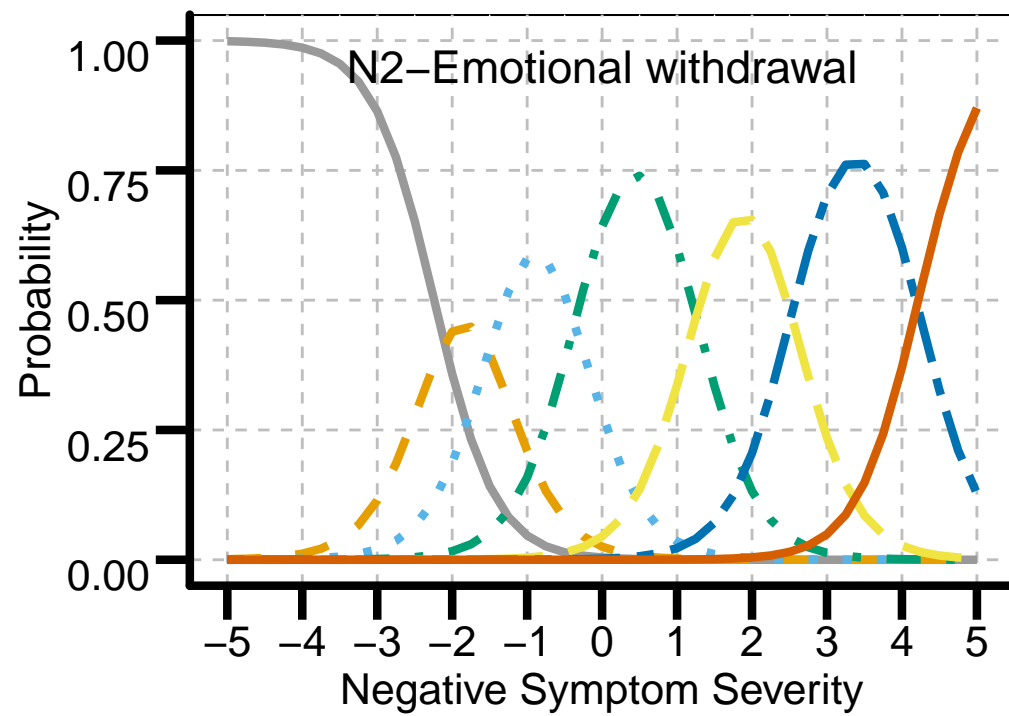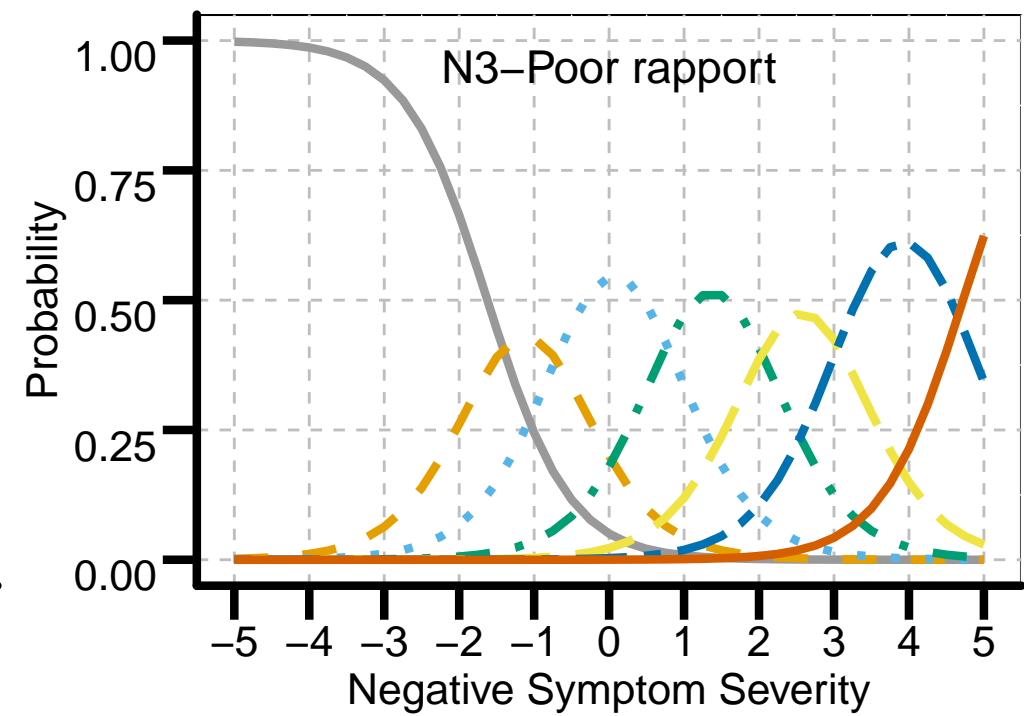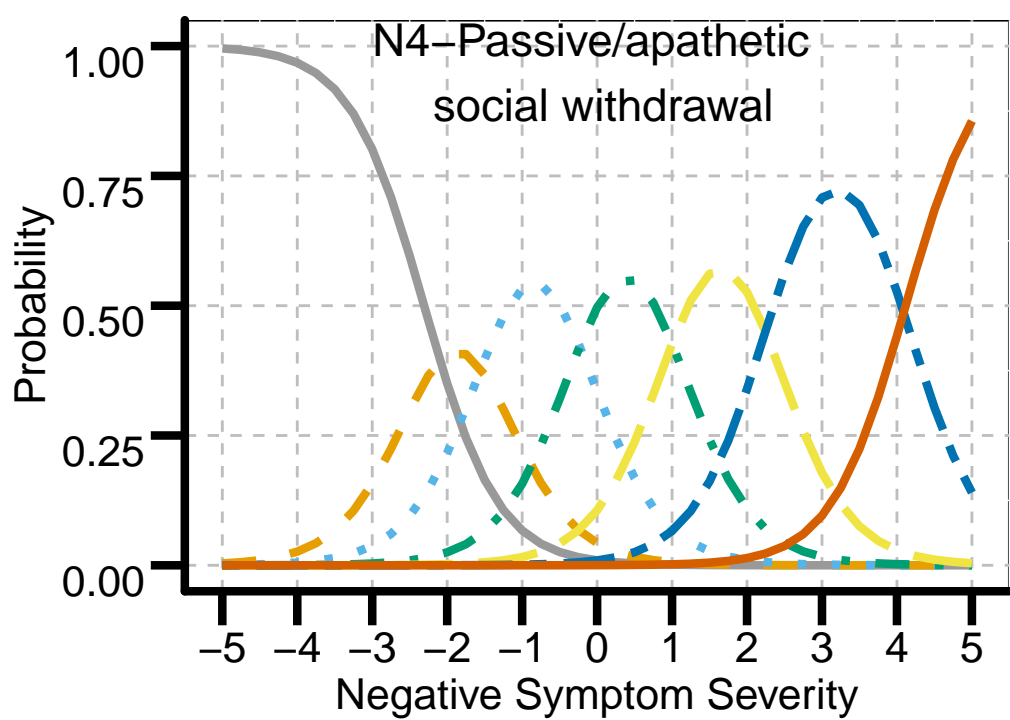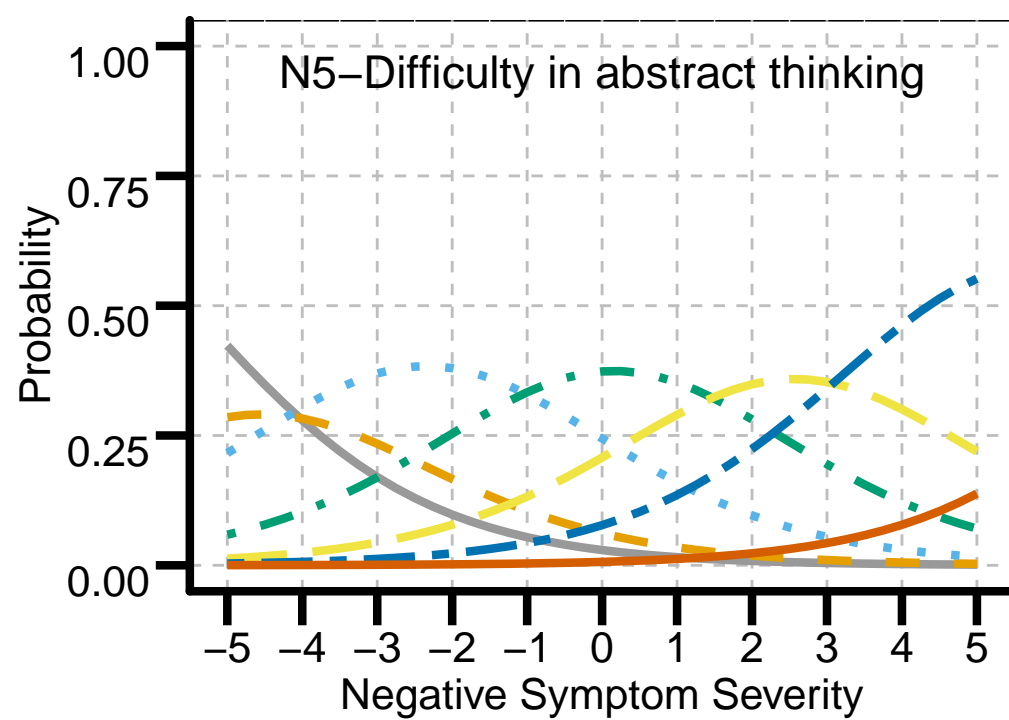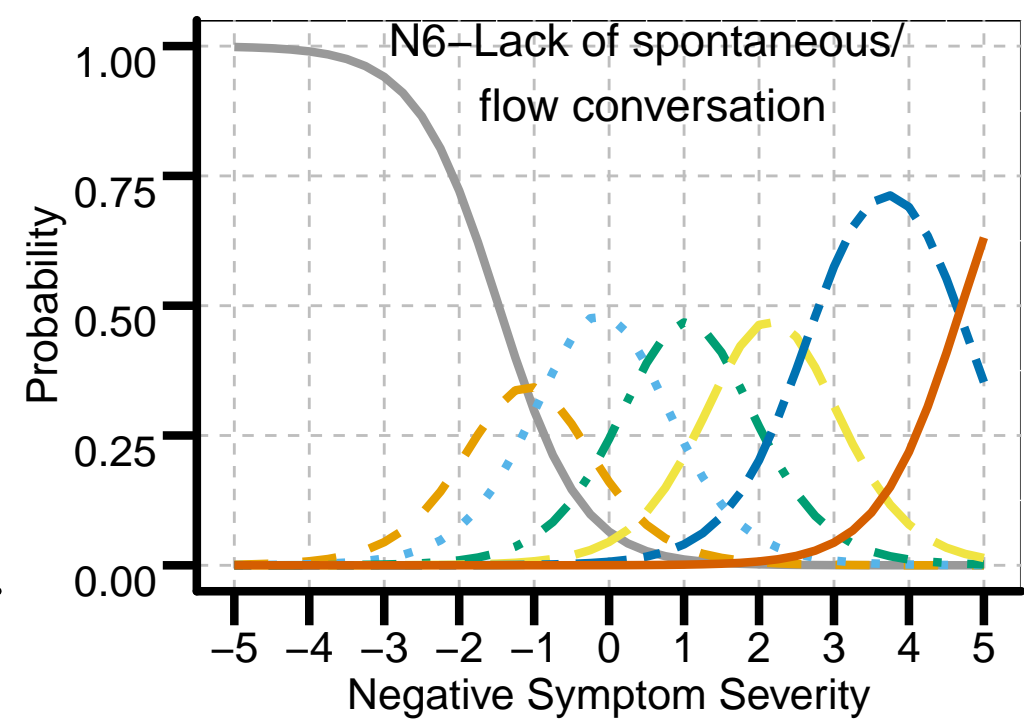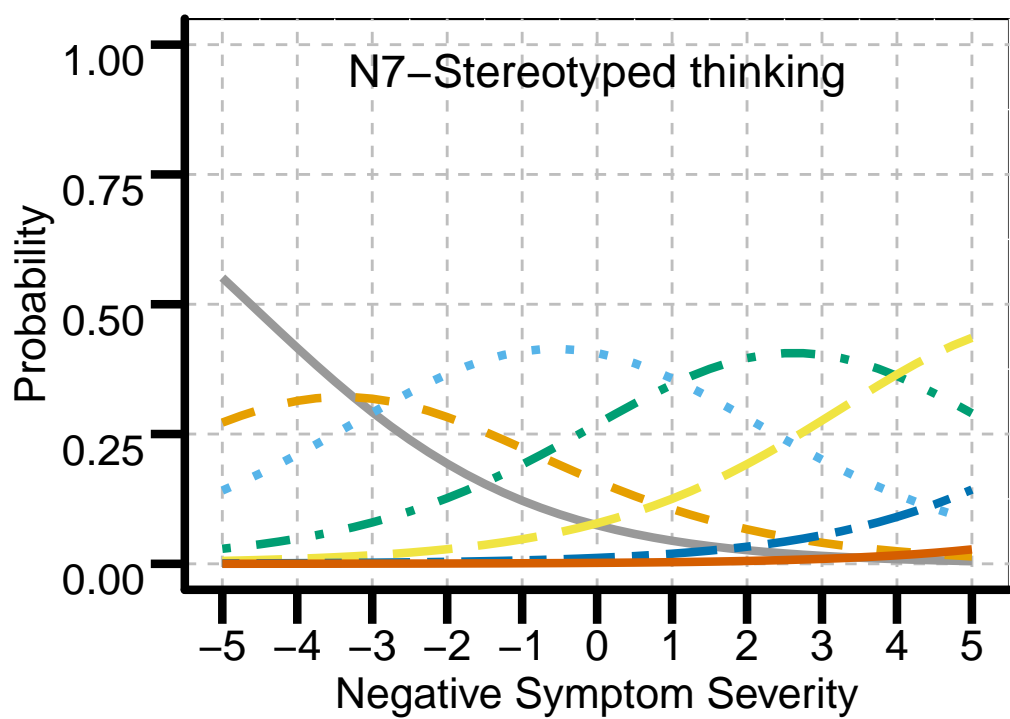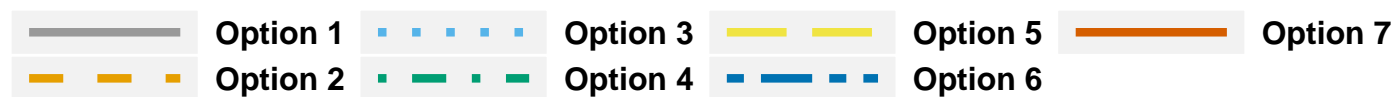

Supplement: rcp21009-sup-0004-fig_s2b.pdf [file rcp21009-sup-0004-fig_s2b.pdf]

— Option 1    ··· Option 3    — Option 5    — Option 7  
- - Option 2    ·-· Option 4    - - Option 6

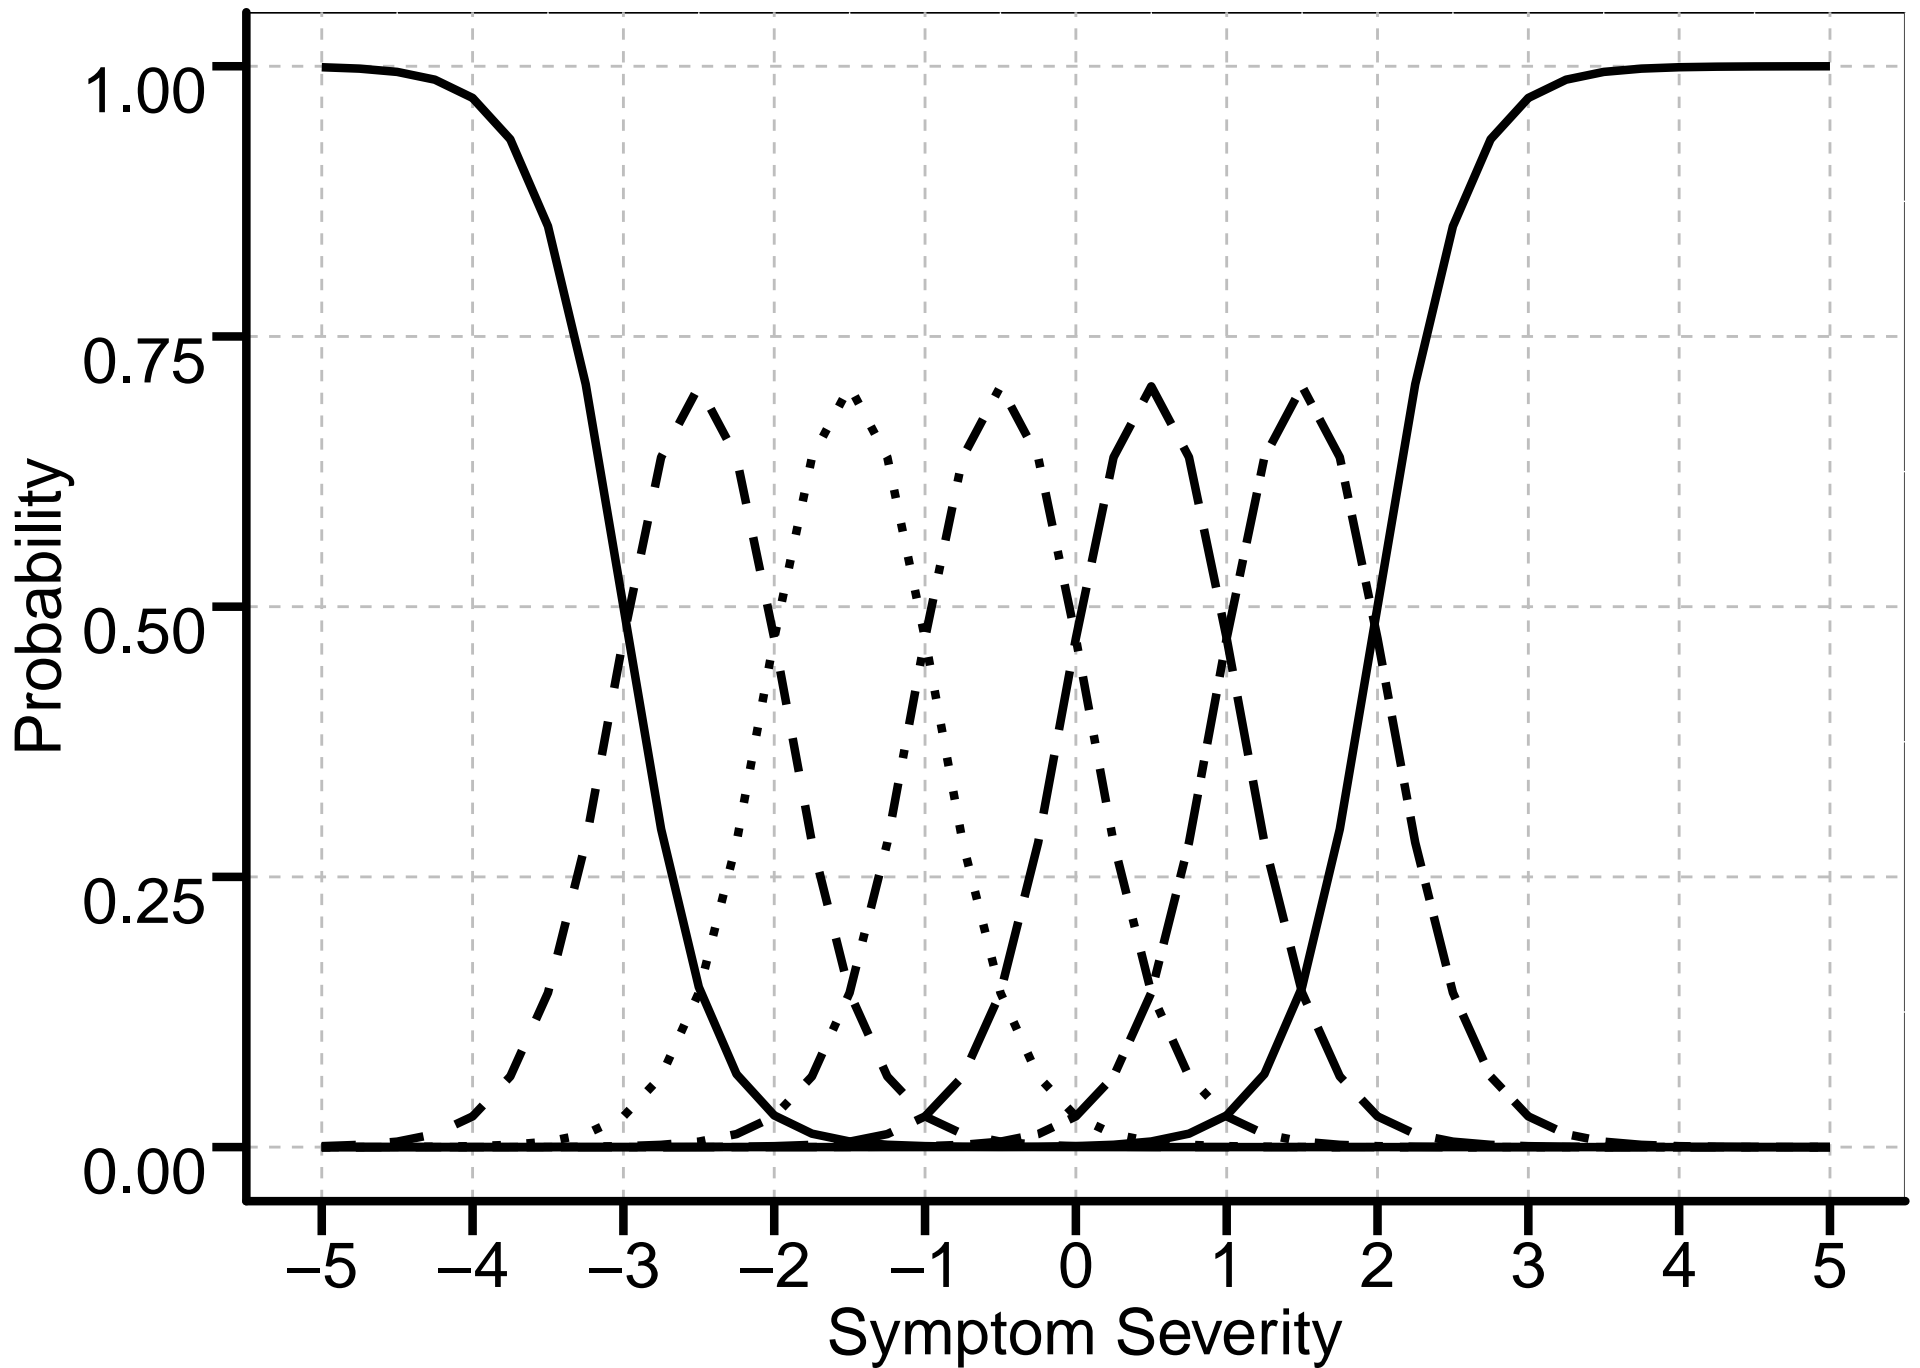

Supplement: rcp21009-sup-0002-fig_s1.pdf [file rcp21009-sup-0002-fig_s1.pdf]

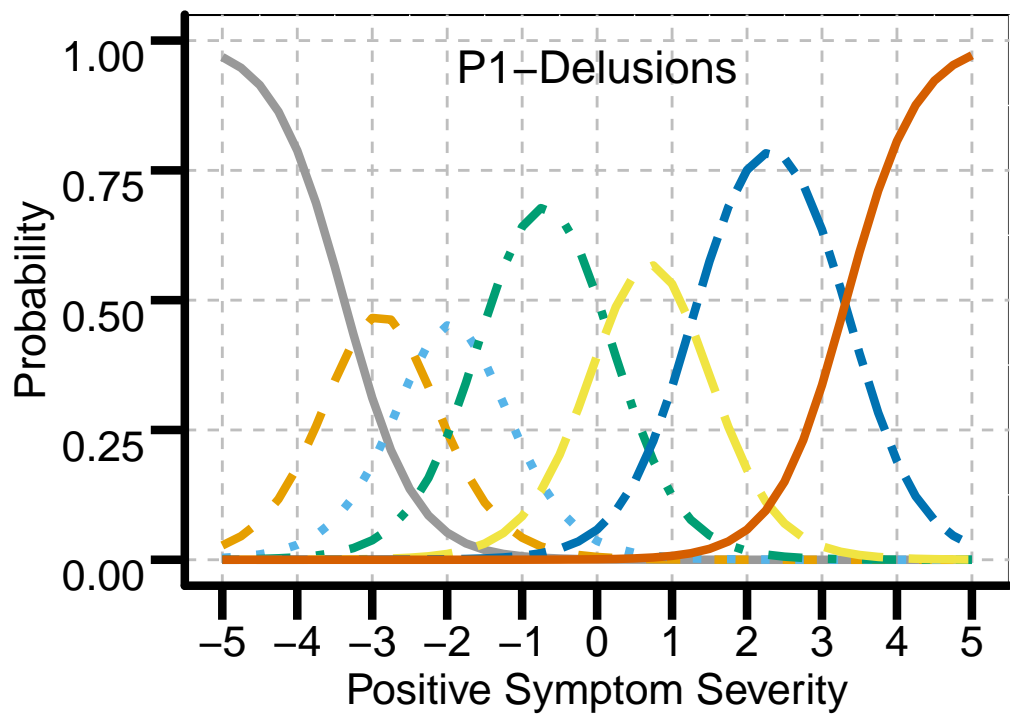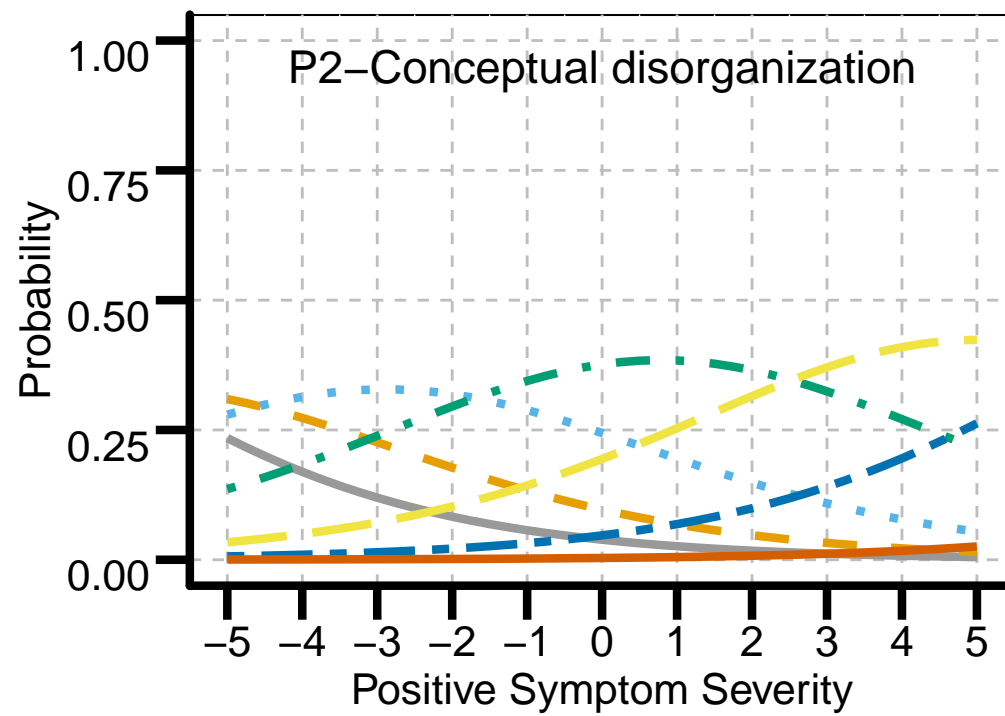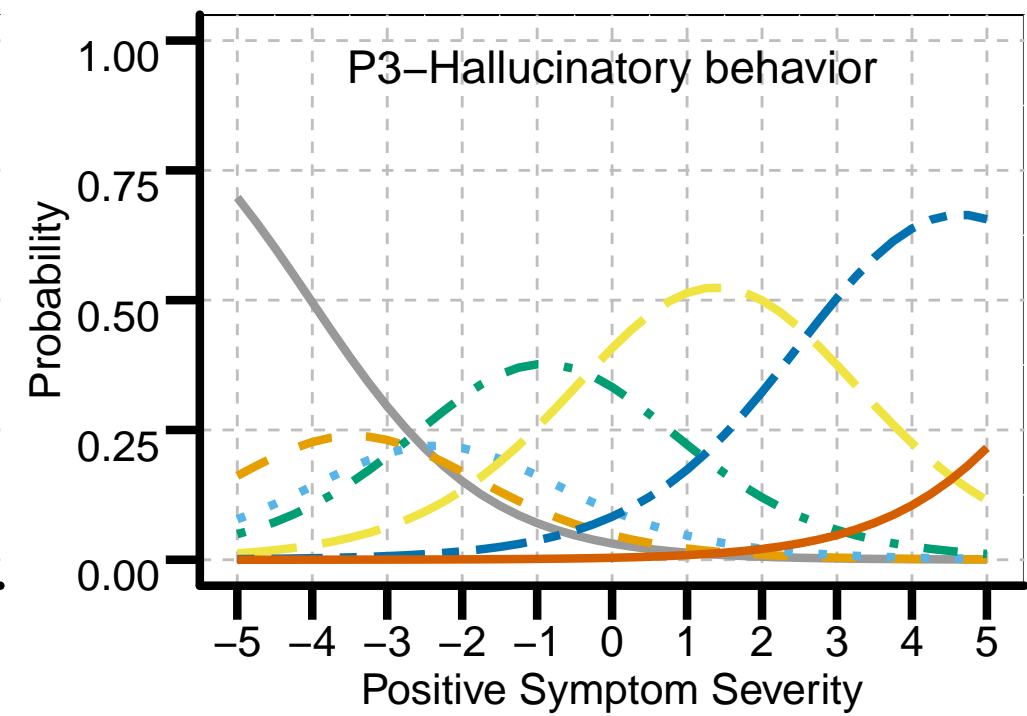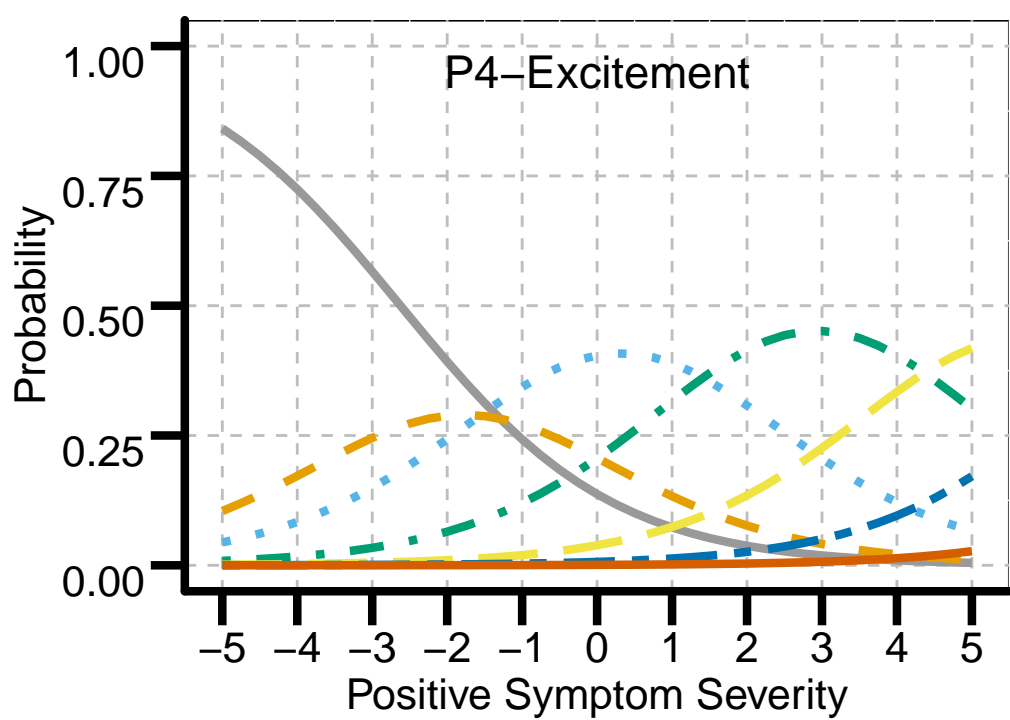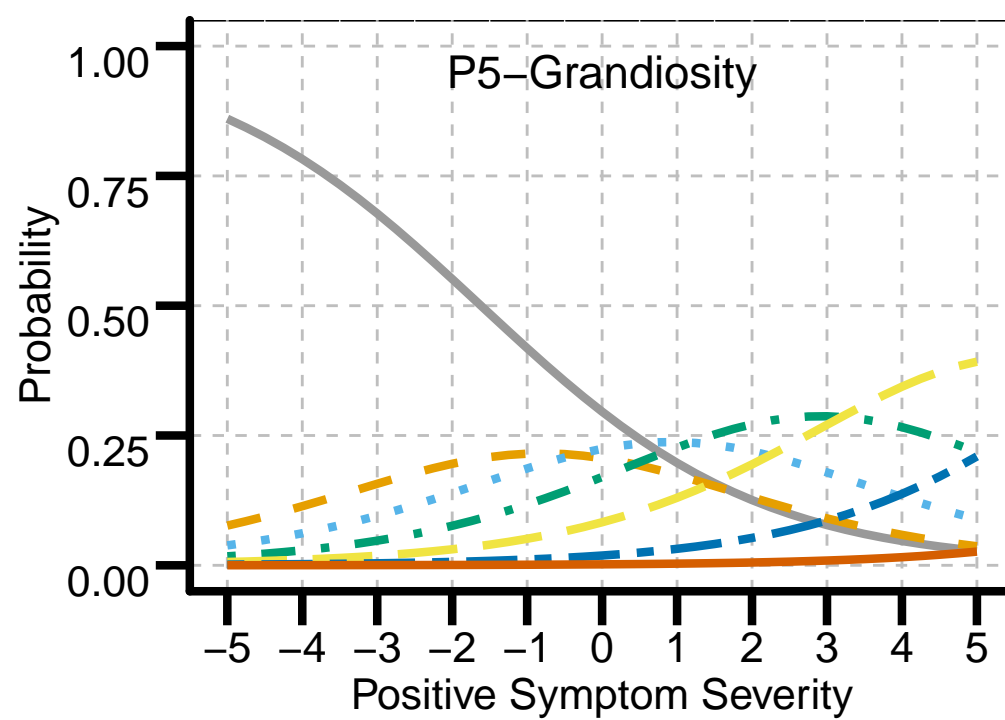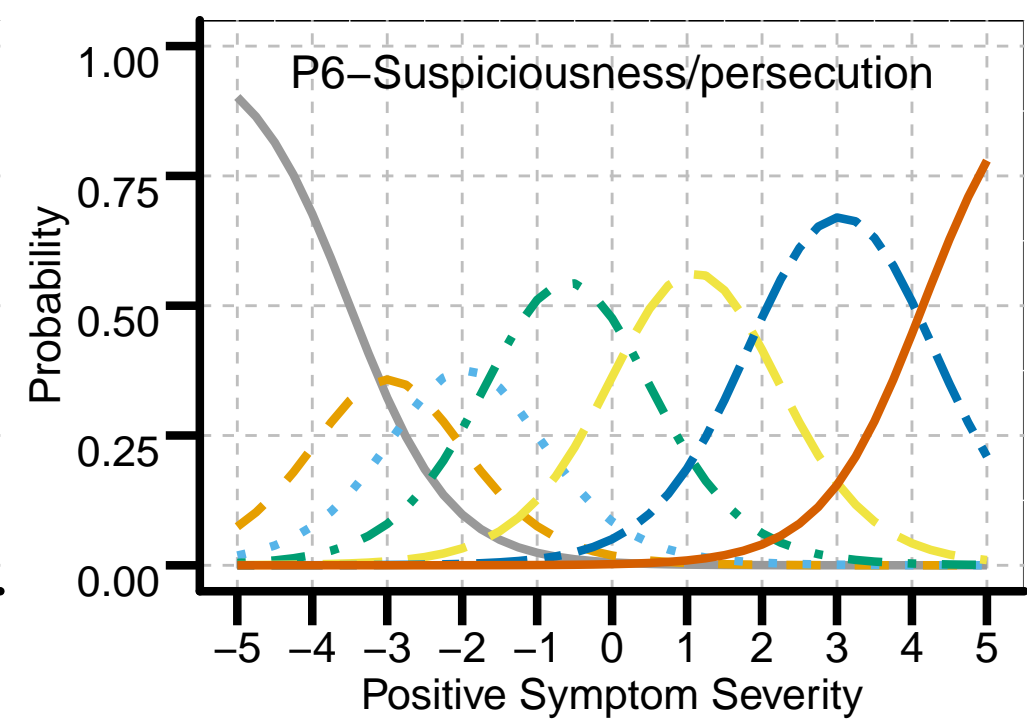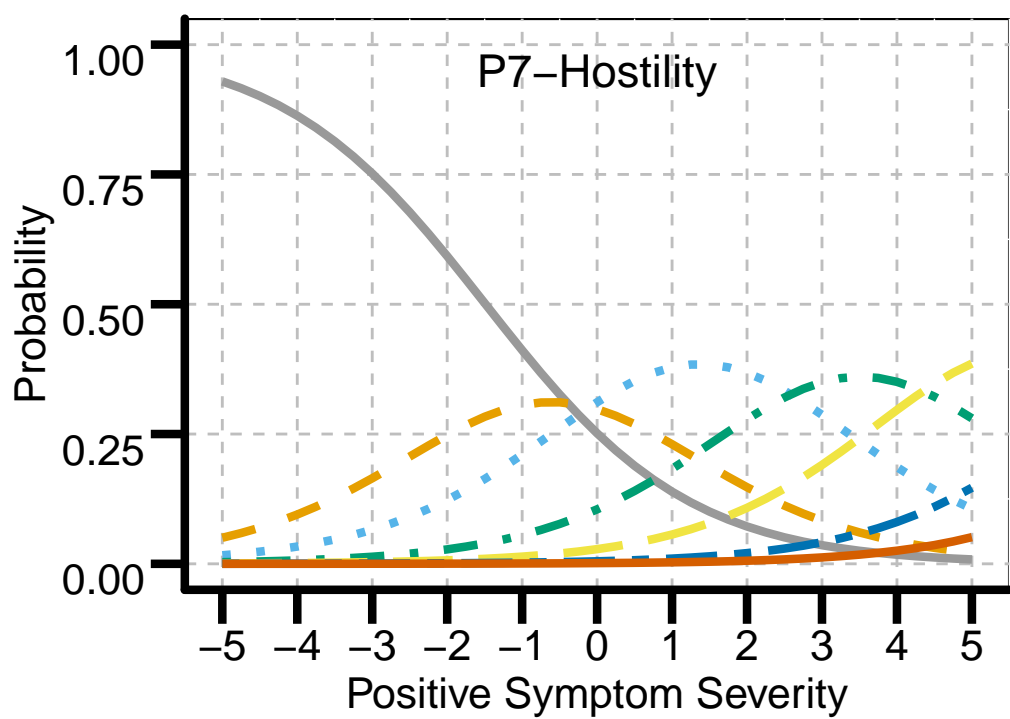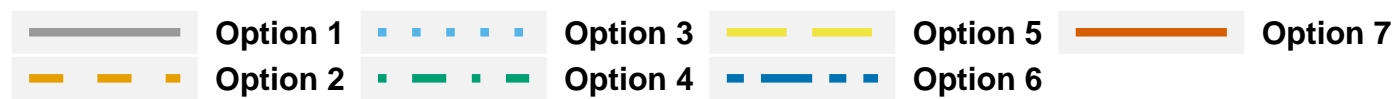

Supplement: rcp21009-sup-0003-fig_s2a.pdf [file rcp21009-sup-0003-fig_s2a.pdf]

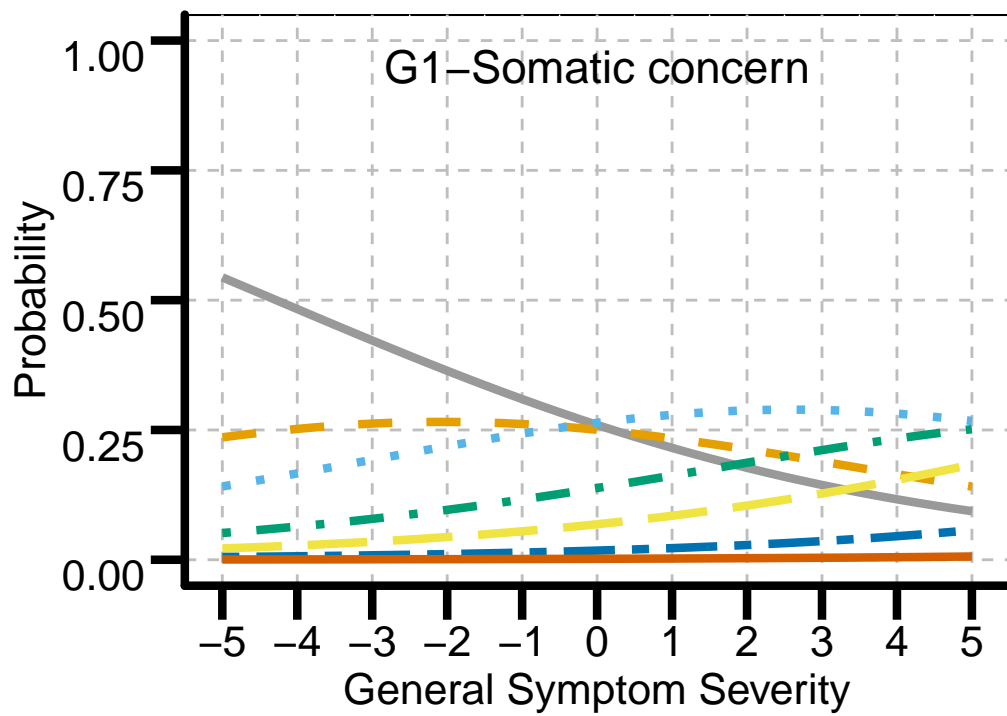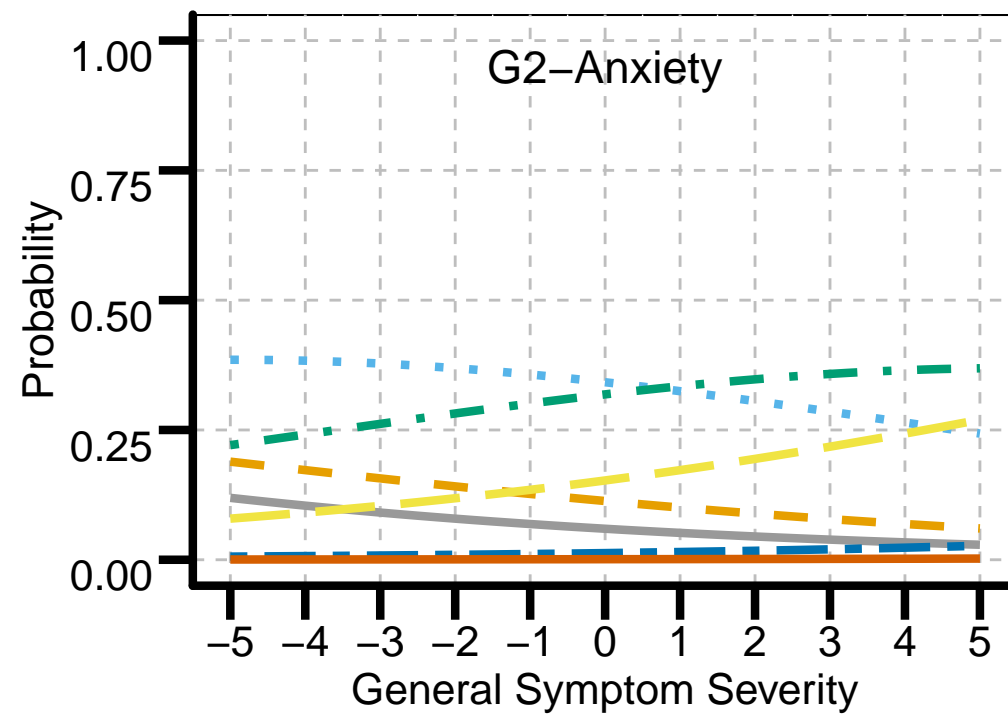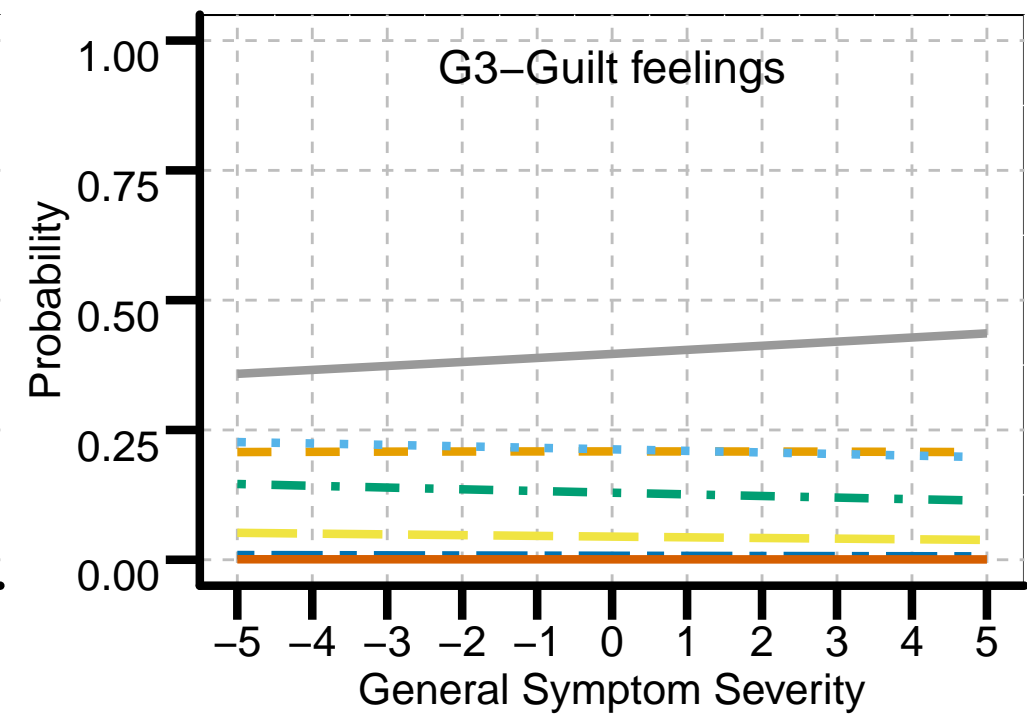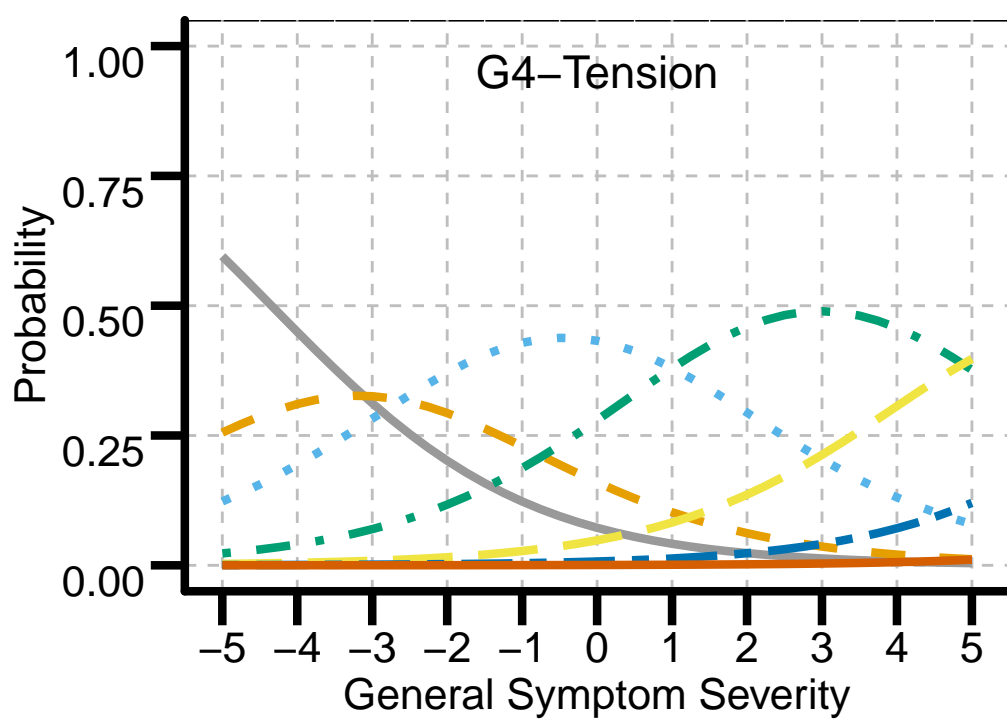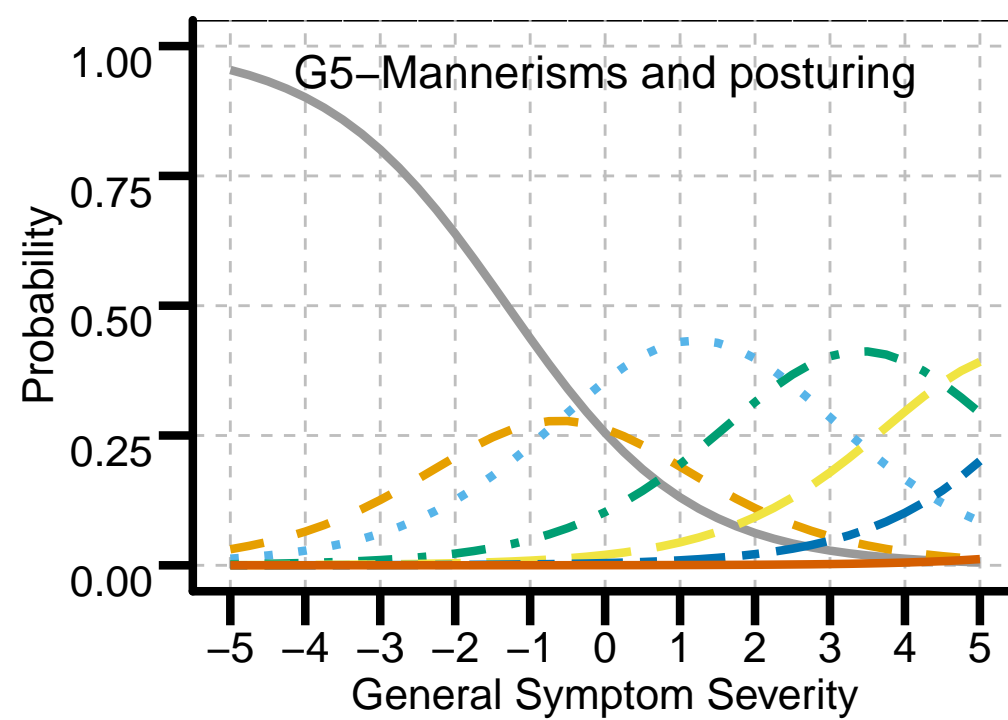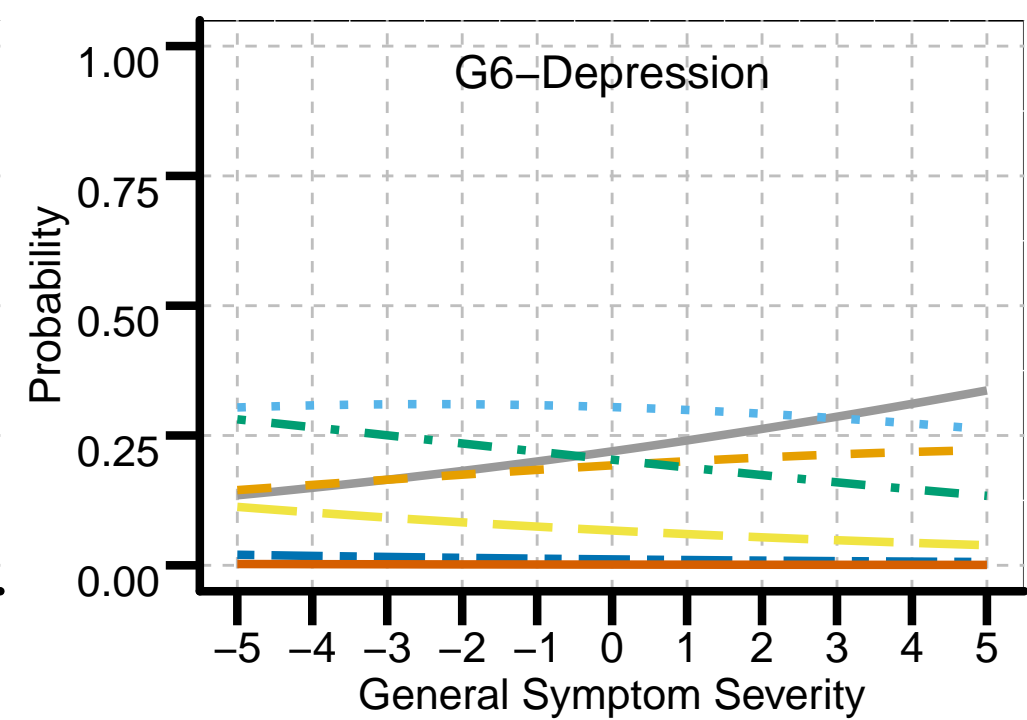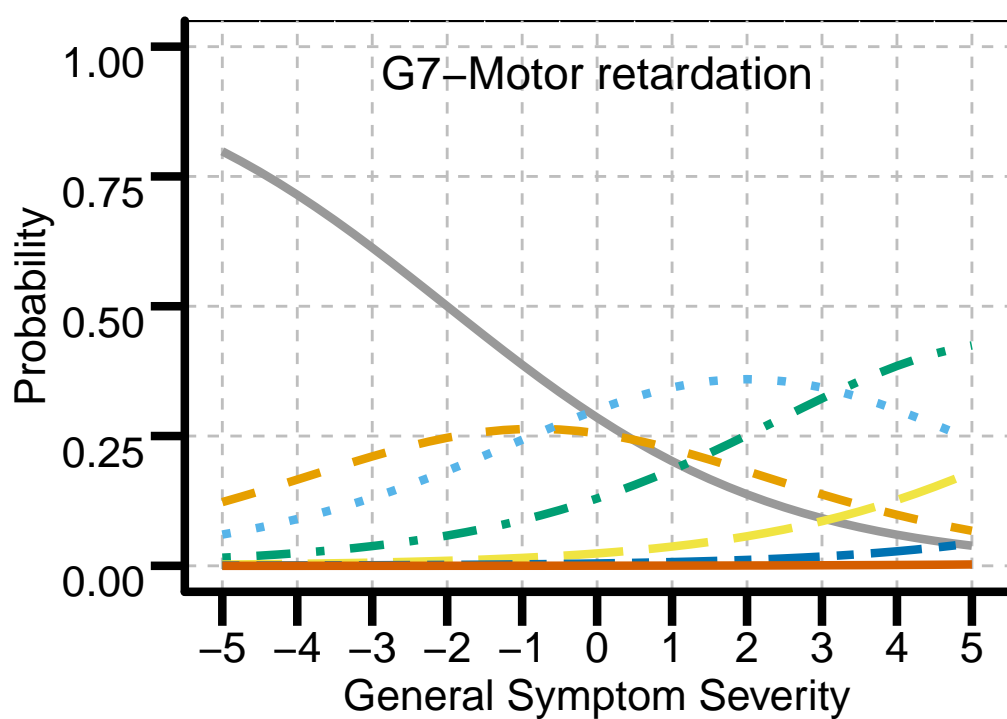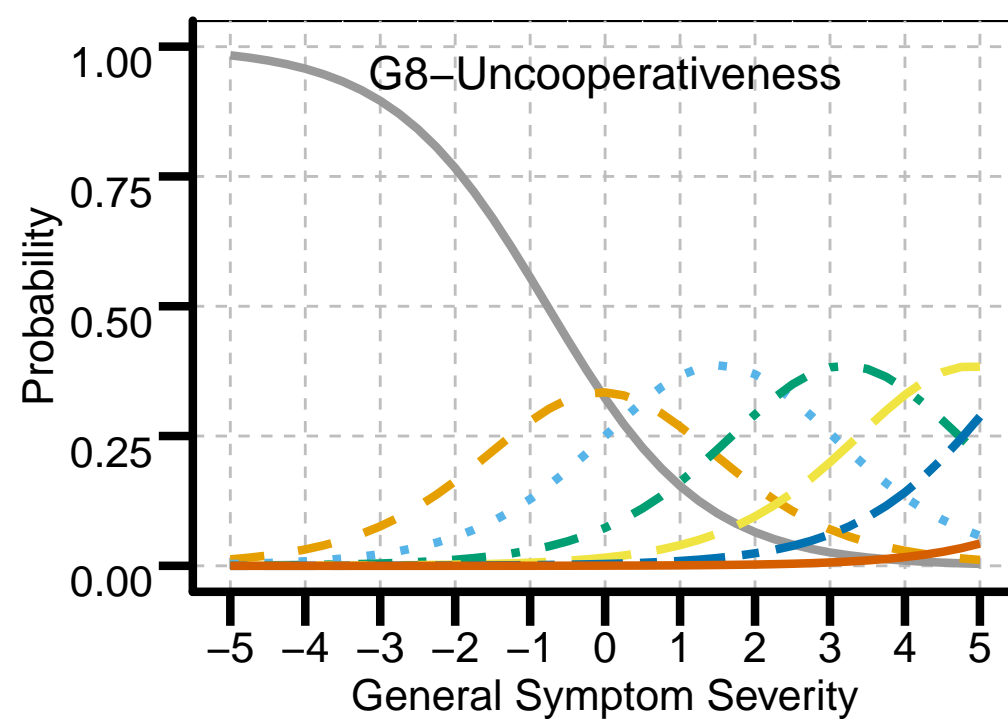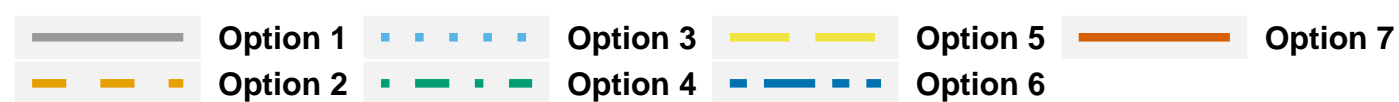

Supplement: rcp21009-sup-0005-fig_s2c.pdf [file rcp21009-sup-0005-fig_s2c.pdf]

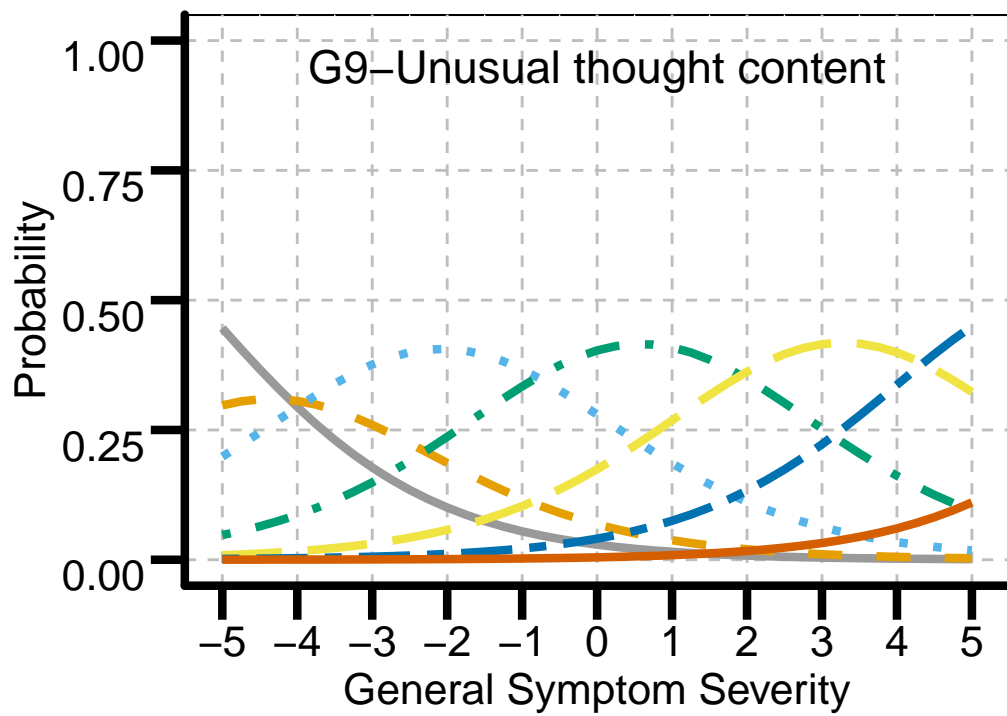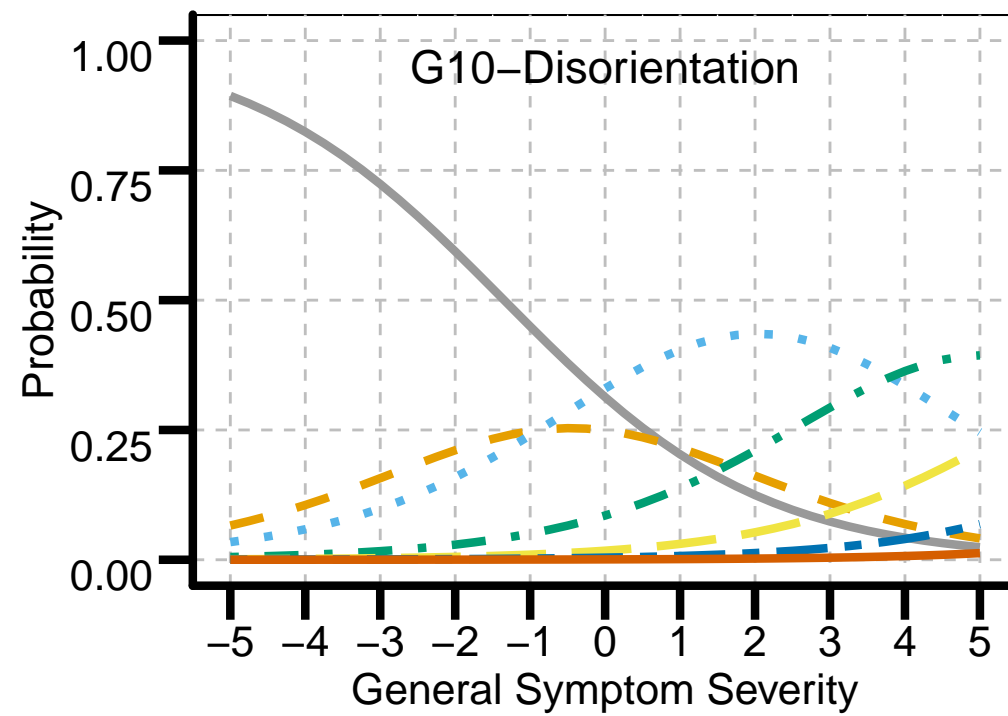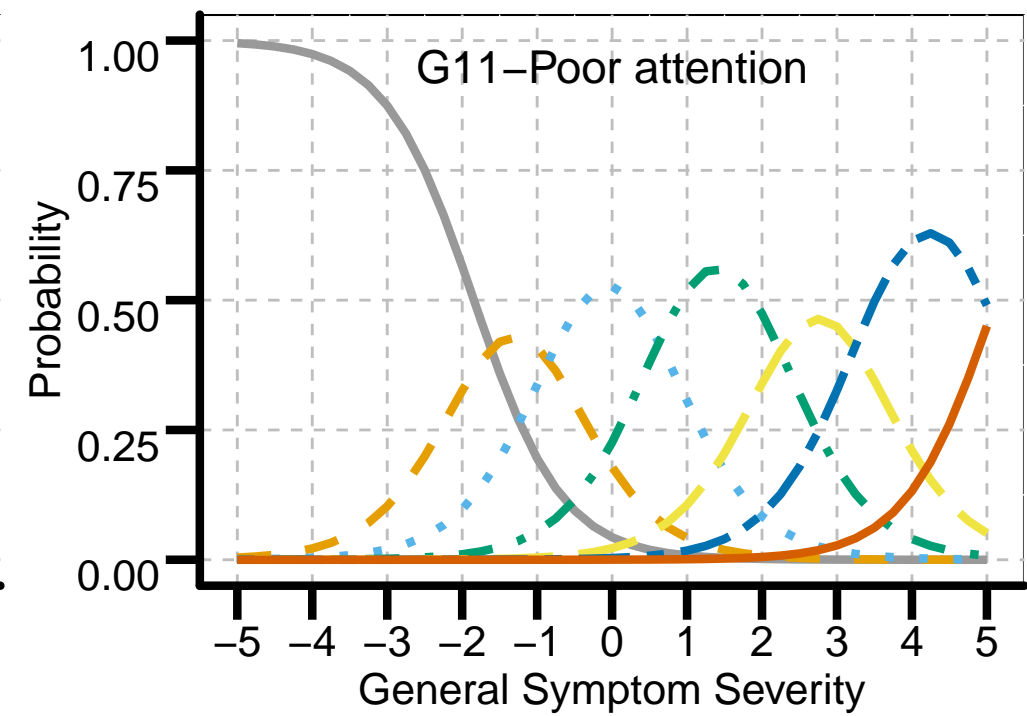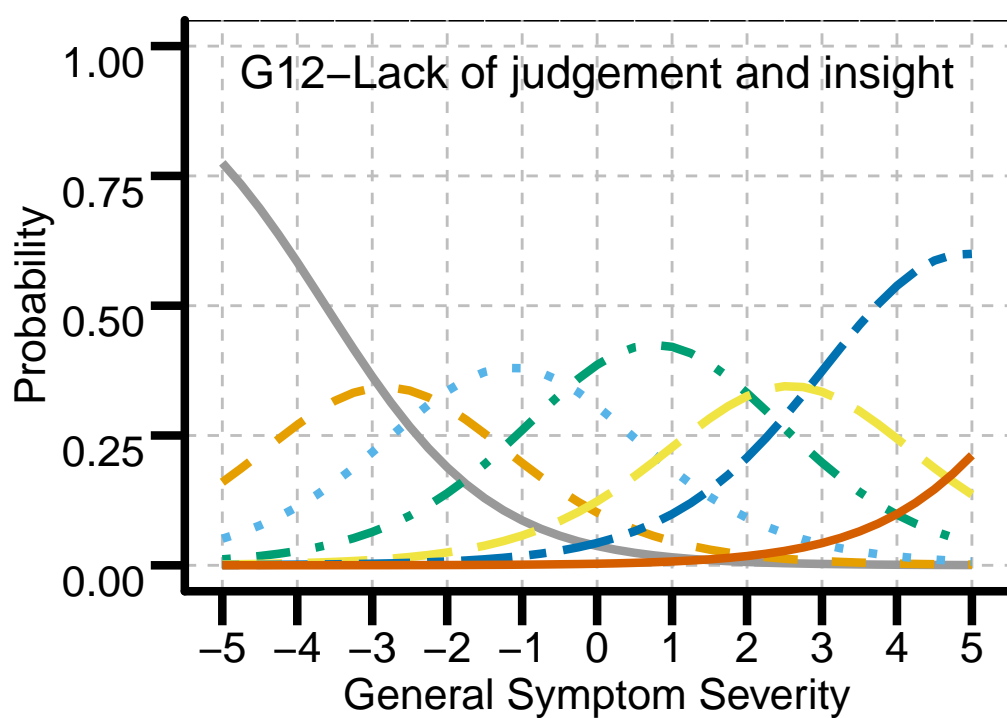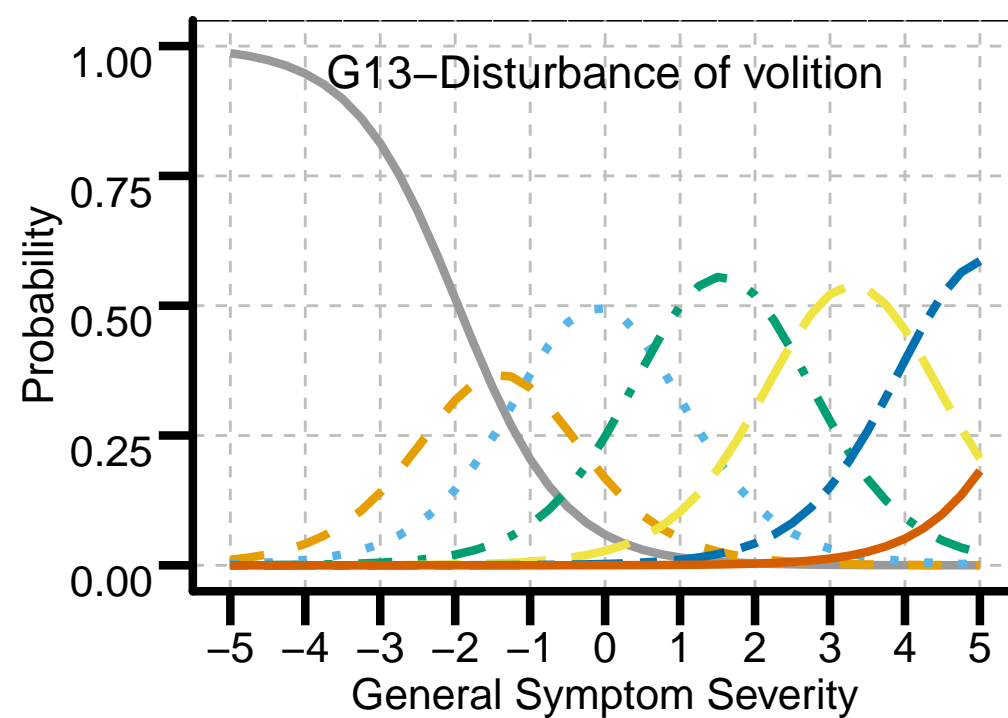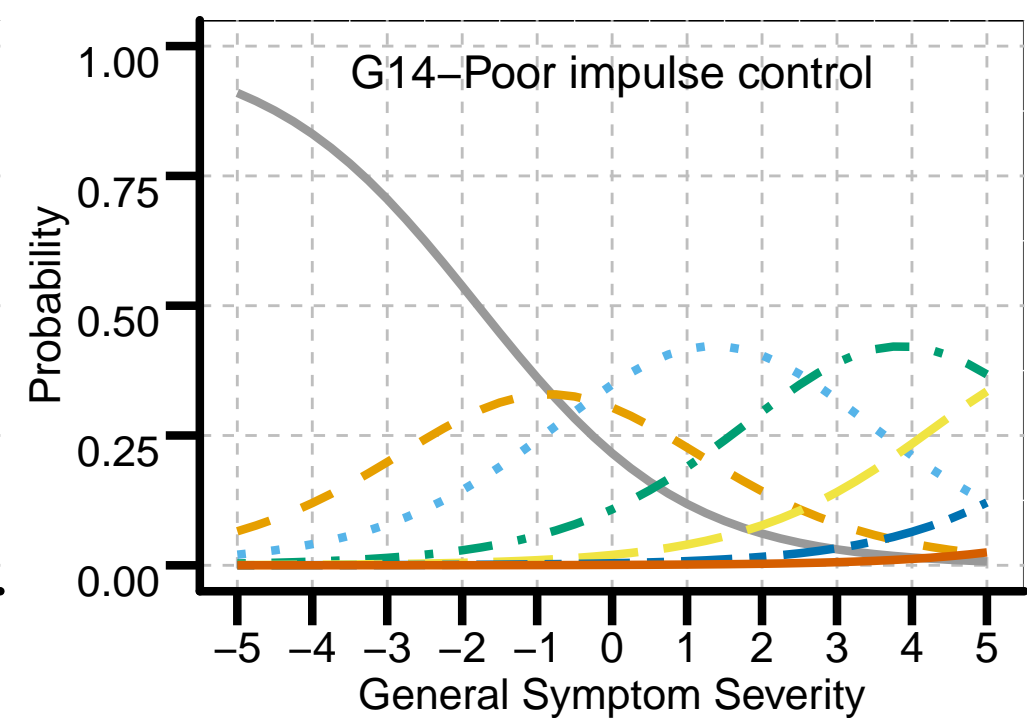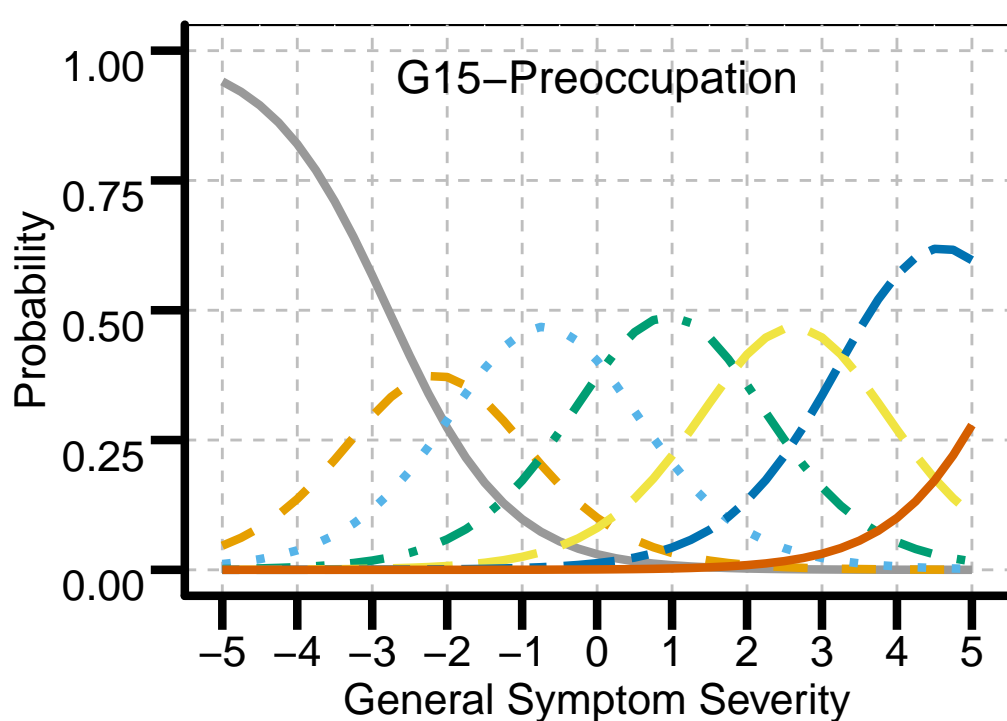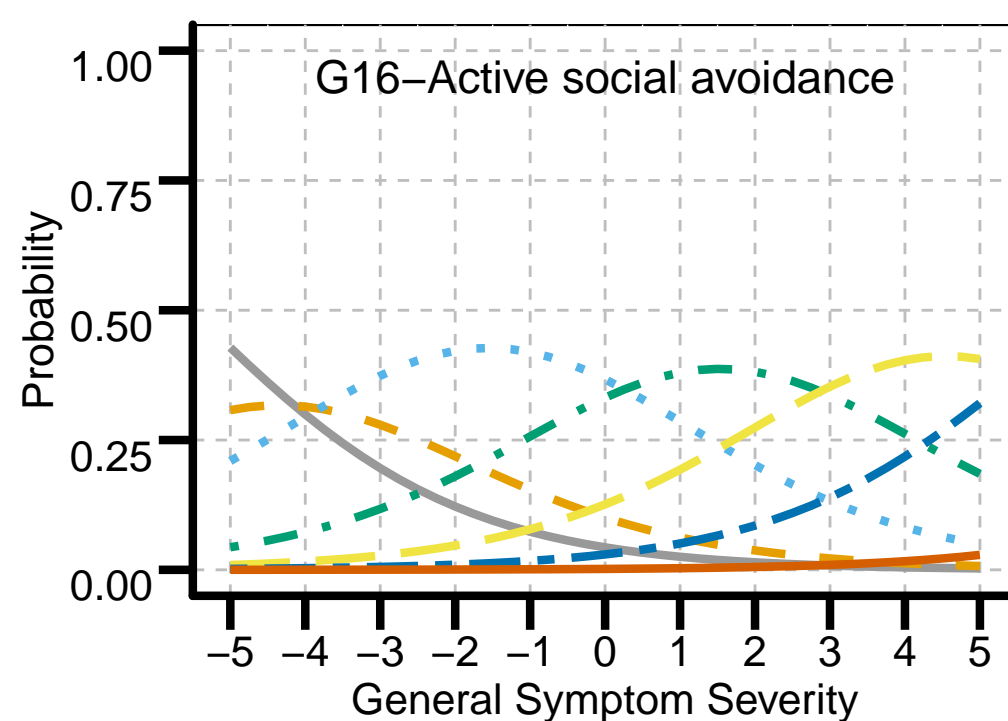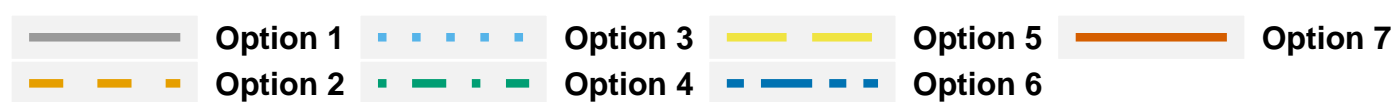

Supplement: rcp21009-sup-0006-fig_s2d.pdf [file rcp21009-sup-0006-fig_s2d.pdf]
